# Supplementary material for: Novel Modeling of Combinatorial miRNA Targeting Identifies SNP with Potential Role in Bone Density
Source: PLoS Comput Biol. 2012 Dec 20;8(12):e1002830. doi: 10.1371/journal.pcbi.1002830 (PMC3527281; doi:10.1371/journal.pcbi.1002830)
Supplement: Table S2 — PAR-CLIP H.sapiens ecdf analysis details. For each considered target prediction tool (ComiR, miRanda, PITA, TargetScan and mirSVR) we report the mean, the standard deviation of the mean (sdm), the number of genes, the pvalue (pKS) and D value (dKS) of the KS test, and the W rank test pvalue (pW) of each decile (or group) of genes. Genes containing CCRs in the 3′UTR sequence are grouped by deciles with respect to their binding score for the considered target prediction tool. KS test and W rank test are performed by comparing each decile or group of genes with the reference set composed by genes that don't contain CCR in the 3′UTR sequence. Columns B–F contain results obtained by restricting the binding site search on CCR. Columns G–K contain the results obtained by analyzing the complete 3′UTR sequence. (XLSX) [file pcbi.1002830.s010.xlsx]

## Sheet: Sheet1
Supplementary Table S2. PAR-CLIP H.sapiens ecdf analysis details. For each considered target prediction tool (ComiR, miRanda, PITA, TargetScan and mirSVR) we report the mean, the standard deviation of the mean (sdm), the number of genes, the pvalue (pKS) and D value (dKS) of the KS test, and the W rank test pvalue (pW) of each decile (or group) of genes. Genes containing CCRs in the 3’UTR sequenc…
ComiR
	restricted on CCRs						complete 3'utr
deciles	mean	sdm	# genes	pKS	dKS	pW	mean	sdm	# genes	pKS	dKS	pW
1	0.189	0.015	330	0	0.57	1.25e-78	0.083	0.005	1507	0	0.288	2.2e-105
2	0.121	0.012	329	0	0.443	9.55e-36	0.048	0.005	1506	0	0.215	1.82e-34
3	0.091	0.01	330	0	0.43	2.17e-30	0.02	0.004	1506	0	0.18	5.03e-09
4	0.05	0.009	329	0	0.319	0.0129	0.005	0.003	1506	0	0.131	0.0309
5	0.04	0.009	330	0	0.299	3.373e-07	0.005	0.003	1507	0	0.145	0.0027
6	0.023	0.01	329	0	0.266	0.10129	-0.006	0.003	1506	3e-07	0.0898	0.934
7	0.014	0.007	329	0	0.284	0.00145	-0.006	0.003	1574	5.71e-08	0.0889	0.575
8	0.011	0.008	330	4.75e-12	0.205	0.853	-0.011	0.003	1438	2.19e-06	0.0796	0.0397
9	0.013	0.008	329	0	0.261	0.0473	-0.015	0.002	1506	1.79e-07	0.042	0.000364
10	0.014	0.008	330	0	0.252	0.206	-0.012	0.002	1507	0.0565	0.0411	0.147
ref	-0.006	0.001	10227				-0.006	0.001	10227
miRanda	restricted on CCRs						complete 3'utr
deciles	mean	sdm	# genes	pKS	dKS	pW	mean	sdm	# genes	pKS	dKS	pW
1	0.1	0.011	329	0	0.398	9.8e-26	0.02	0.003	1496	0	0.155	6.1e-07
2	0.083	0.011	326	0	0.416	5.5e-23	0.012	0.004	1426	0	0.159	6.9e-05
3	0.078	0.013	334	0	0.325	3.2e-09	0.014	0.004	1610	0	0.146	0.00013
4	0.061	0.011	327	0	0.37	6.2e-15	0.011	0.004	1508	0	0.132	0.0037
5	0.05	0.009	327	0	0.328	1.9e-10	0.008	0.003	1495	0	0.14	3.4e-06
6	0.055	0.009	331	0	0.336	2.6e-09	0.015	0.004	1505	0	0.131	1.6e-05
7	0.047	0.009	332	0	0.336	4.2e-11	0.015	0.003	1511	0	0.122	3.7e-07
8	0.042	0.009	326	0	0.275	0.00013	0.012	0.004	1506	6.1e-14	0.109	2e-05
9	0.031	0.009	333	0	0.291	0.00018	0.005	0.003	1500	4.3e-08	0.0821	0.0016
10	0.021	0.009	330	0	0.259	0.059	-0.002	0.003	1507	0.47	0.0233	0.62
ref	-0.006	0.001	10277				-0.006	0.001	10227
PITA	restricted on CCRs						complete 3'utr
deciles	mean	sdm	# genes	pKS	dKS	pW	mean	sdm	# genes	pKS	dKS	pW
1	0.104	0.011	329	0	0.426	3.7e-31	0.02	0.004	1507	0	0.15	3e-06
2	0.104	0.011	329	0	0.428	3e-30	0.019	0.003	1519	0	0.166	1.1e-10
3	0.091	0.011	329	0	0.392	8.3e-24	0.019	0.004	1495	0	0.158	1.7e-07
4	0.056	0.011	329	0	0.316	5.6e-08	0.018	0.004	1529	0	0.153	1.4e-06
5	0.086	0.013	329	0	0.392	5.2e-21	0.011	0.003	1493	0	0.139	9.4e-05
6	0.031	0.009	332	0	0.287	0.00083	0.016	0.003	1498	0	0.125	1.7e-05
7	0.028	0.008	281	0	0.276	0.00039	0.01	0.004	1509	3.3e-16	0.118	0.00027
8			0				0.004	0.003	1505	1.7e-11	0.0985	0.0077
9			0					0.003	1501	7.5e-06	0.0691	0.12
10	0.023	0.004	1037	0	0.263	1.7e-05	-0.006	0.002	1507	0.77	0.0184	0.72
ref	-0.006	0.001	10227				-0.006	0.001	10227
TargetScan	restricted on CCRs						complete 3'utr
groups	mean	sdm	# genes	pKS	dKS	pW	mean	sdm	# genes	pKS	dKS	pW
targets	0.107	0.006	1431	0	0.422	9.2e-113	0.0176	0.0012	11895	0	0.149	2.2e-28
non targets	0.019	0.003	1864	0	0.254	8.7e-07	-0.0133	0.0016	3168	2.9e-05	0.048	0.00032
ref	-0.006	0.001	10227				-0.006	0.001	10227
mirSVR	restricted on CCRs						complete 3'utr
groups	mean	sdm	# genes	pKS	dKS	pW	deciles	mean	sdm	# genes	pKS	dKS	pW
targets	0.091	0.005	1682	0	0.393	8.79e-97	1	0.059	0.005	1509	0	0.264	9.96e-53
non targets	0.021	0.004	1691	0	0.265	6e-09	2	0.034	0.004	1505	0	0.213	1.48e-28
							3	0.027	0.004	1505	0	0.174	7.83e-14
							4	0.022	0.004	1506	0	0.177	5.78e-14
							5	0.012	0.003	1508	0	0.145	0.000297
							6	0.003	0.003	1505	5.12e-10	0.0917	0.043
							7	-0.007	0.003	1507	4.5e-12	0.101	0.323
							8	-0.014	0.003	4518	1.02e-11	0.0644	1.42e-05
ref	-0.006	0.001	10227				ref	-0.006	0.001	10227
