# Supplementary material for: Novel Modeling of Combinatorial miRNA Targeting Identifies SNP with Potential Role in Bone Density
Source: PLoS Comput Biol. 2012 Dec 20;8(12):e1002830. doi: 10.1371/journal.pcbi.1002830 (PMC3527281; doi:10.1371/journal.pcbi.1002830)
Supplement: Table S3 — Comparison of ComiR to TargetScan and PITA on the let-7d/miR-30b transfection and co-transfection datasets. Performance was measured on the set of down-regulated genes in each experiment. (XLSX) [file pcbi.1002830.s011.xlsx]

## Sheet: Sheet1
Supplementary Table S3. Comparison of ComiR to TargetScan and PITA on the let-7d / miR-30b transfection and co-transfection datasets. Performance was measured on the set of down-regulated genes in each experiment.
Top 20% of the predictions of each tool							Top 25% of the predictions of each tool							Top 30% of the predictions of each tool
	Sensitivity							Sensitivity							Sensitivity
	ComiR	TS	PITA	miRanda	mirSVR			ComiR	TS	PITA	miRanda	mirSVR			ComiR	TS	PITA	miRanda	mirSVR
Both	0.336	0.412	0.218	0.226	0.178		Both	0.393648	0.411935	0.264678	0.274	0.178		Both	0.438	0.412	0.324	0.332	0.178
let-7d	0.309	0.259	0.223	0.241	0.1		let-7d	0.353149	0.259023	0.265393	0.284	0.1		let-7d	0.4	0.259	0.332	0.338	0.1
miR-30b	0.259	0.24	0.205	0.181	0.121		miR-30b	0.304013	0.240242	0.242991	0.229	0.121		miR-30b	0.345	0.24	0.269	0.274	0.121
	Specificity							Specificity							Specificity
	ComiR	TS	PITA	miRanda	mirSVR			ComiR	TS	PITA	miRanda	mirSVR			ComiR	TS	PITA	miRanda	mirSVR
Both	0.783532	0.720347	0.801084	0.804	0.855		Both	0.733588	0.720347	0.750955	0.754	0.855		Both	0.680995	0.720347	0.701564	0.704	0.855
let-7d	0.790028	0.863275	0.802068	0.795	0.941		let-7d	0.736132	0.863275	0.75145	0.743	0.941		let-7d	0.681228	0.863275	0.702912	0.692	0.941
miR-30b	0.782249	0.817053	0.800556	0.789	0.898		miR-30b	0.731531	0.817053	0.74945	0.74	0.898		miR-30b	0.67499	0.817053	0.728037	0.687	0.898
